# Supplementary material for: BAP1 Loss Promotes Suppressive Tumor Immune Microenvironment via Up-Regulation of PROS1 in Class 2 Uveal Melanomas
Source: Preprints.org preprint supplement (doi:10.20944/preprints202206.0236.v1), 2022-06-16
Supplement: Supplementary file 1 [file supplementary]

**A**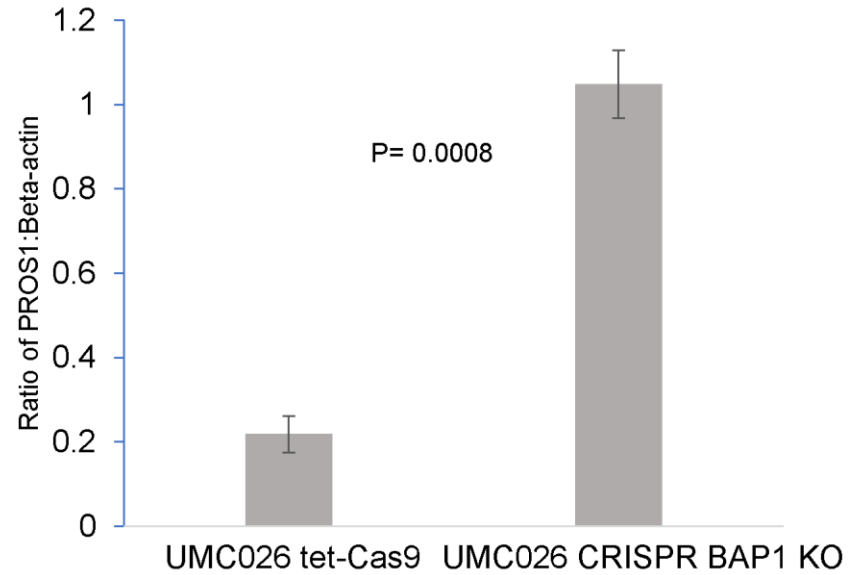**B**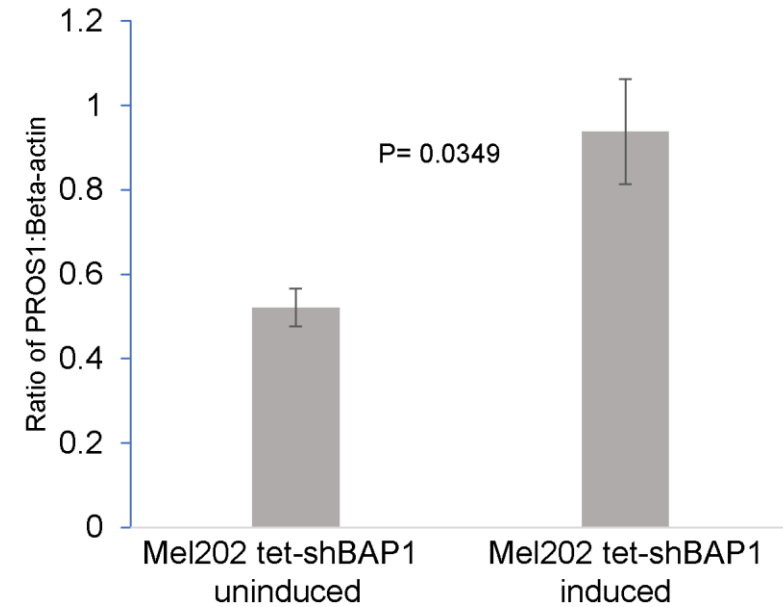

**Figure S1. (A)** Western blots of lysates from UMC026 tet-Cas9 and UMC026 CRISPR BAP1-KO cells reveal increase of PROS1 protein following BAP1 KO by densitometric quantitation of multiple blots (n=3). **(B)** Western blots of lysates from Mel202 tet-shBAP1 uninduced and Mel202 tet-shBAP1 uninduced reveal increase of PROS1 protein following BAP1 knockdown by densitometric quantitation of multiple blots (n=3). Error bars=SEM.

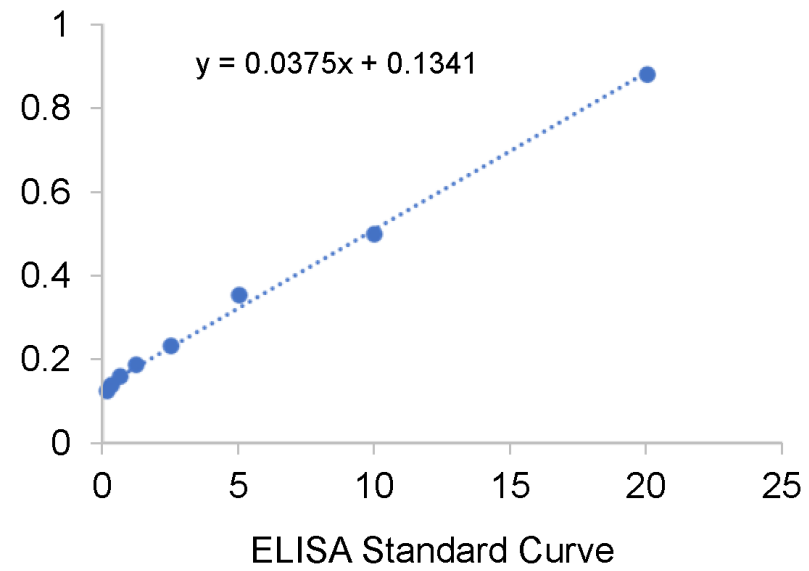

**Figure S2.** ELISA standard curve documenting linearity of analyte concentration.

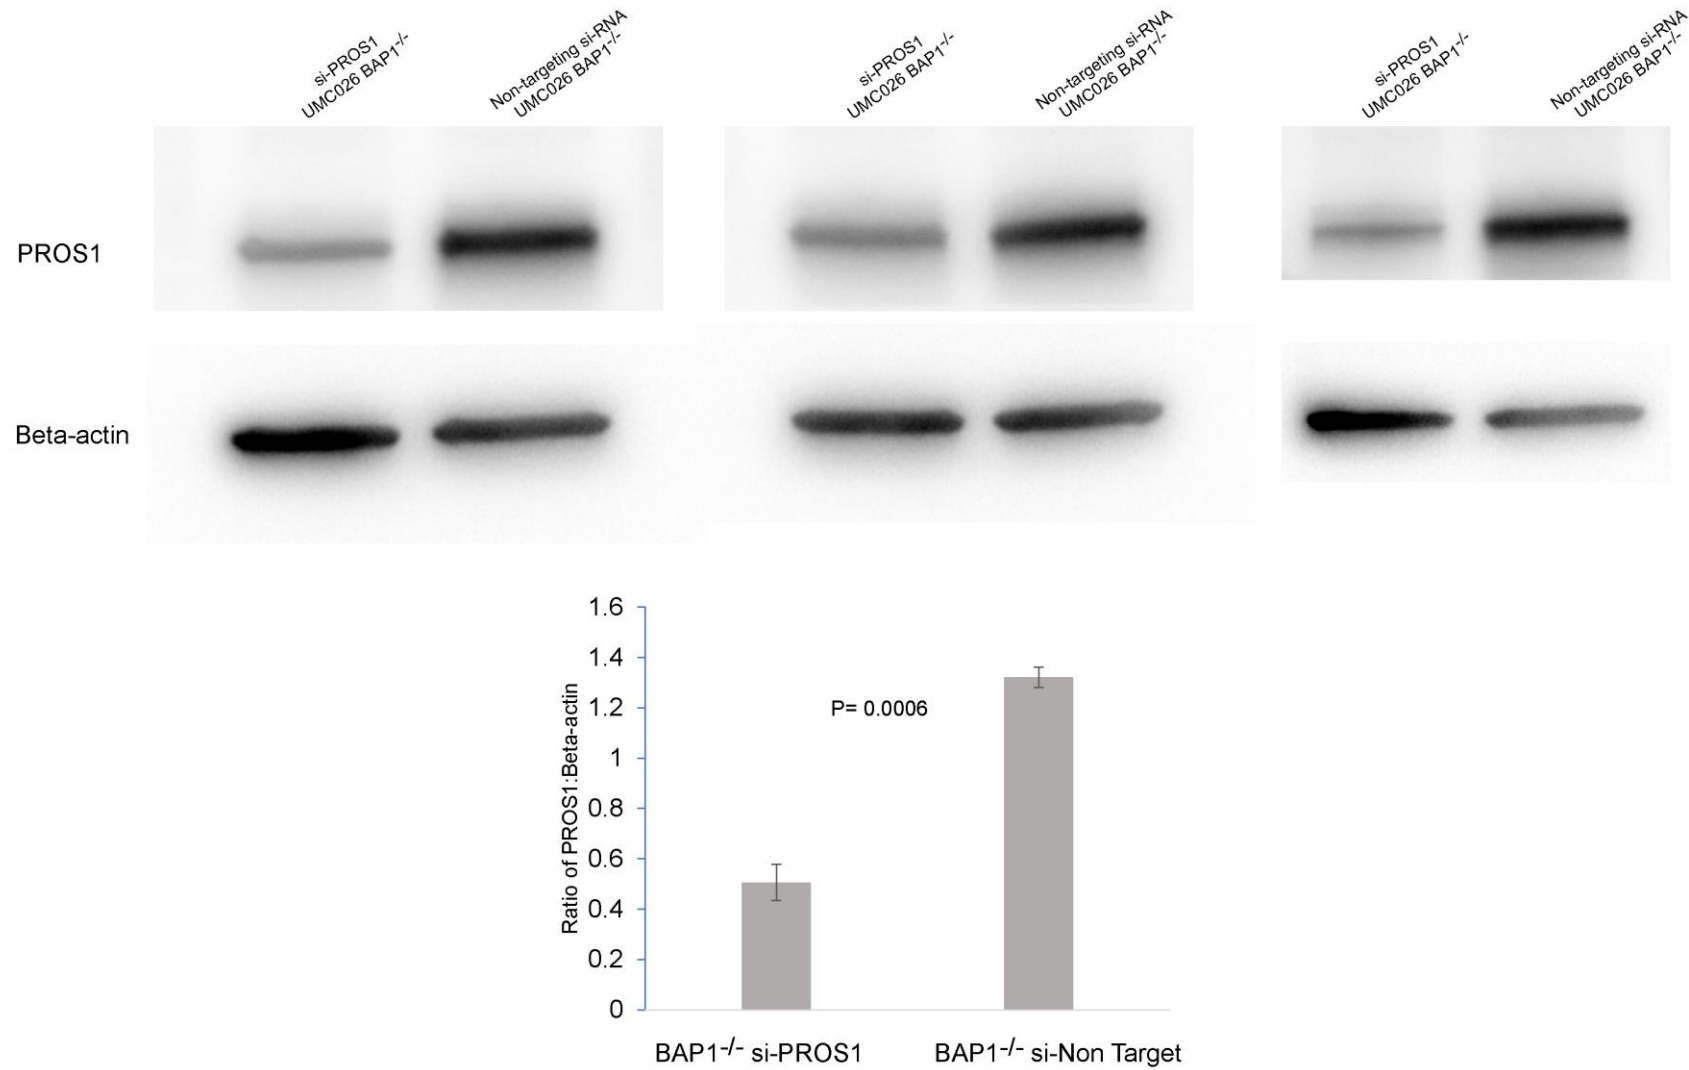

**Figure S3.** Confirmation of PROS1 knockdown in UMC026 BAP1-negative cells used in RAW 264.7 cell co-culture functional assays. Western blots of lysates from the UMC026 BAP1-KO cells used in co-culture experiments (**Figure 3E, F**) indicate siRNA knockdown of PROS1 in a range of 52-75% by densitometric quantitation of multiple blots (n=3). Error bars=SEM.

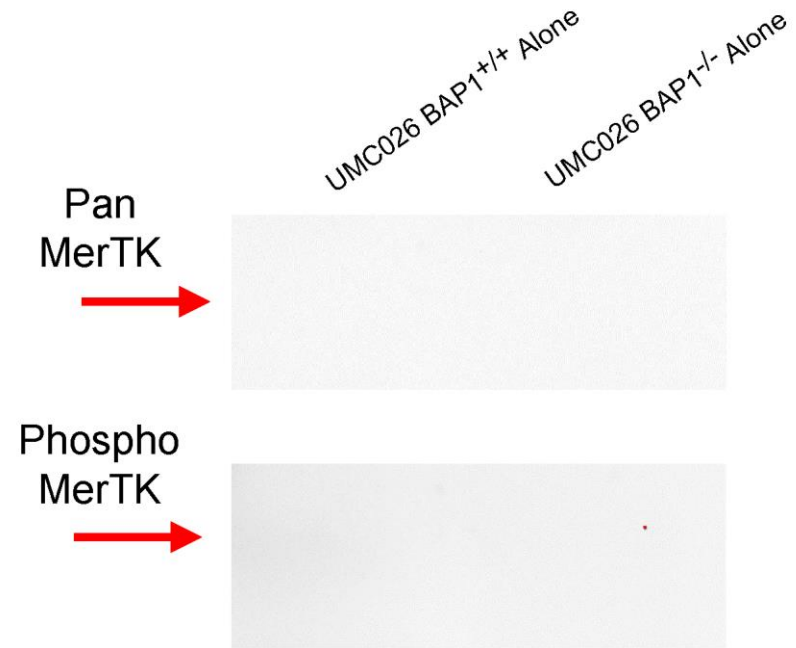

**Figure S4.** Immunoprecipitated MERTK expression is undetected when the melanocyte cell lines are cultured independently of RAW 264.7 cells.

Class 1 Uveal Melanoma

BAP1: Yellow

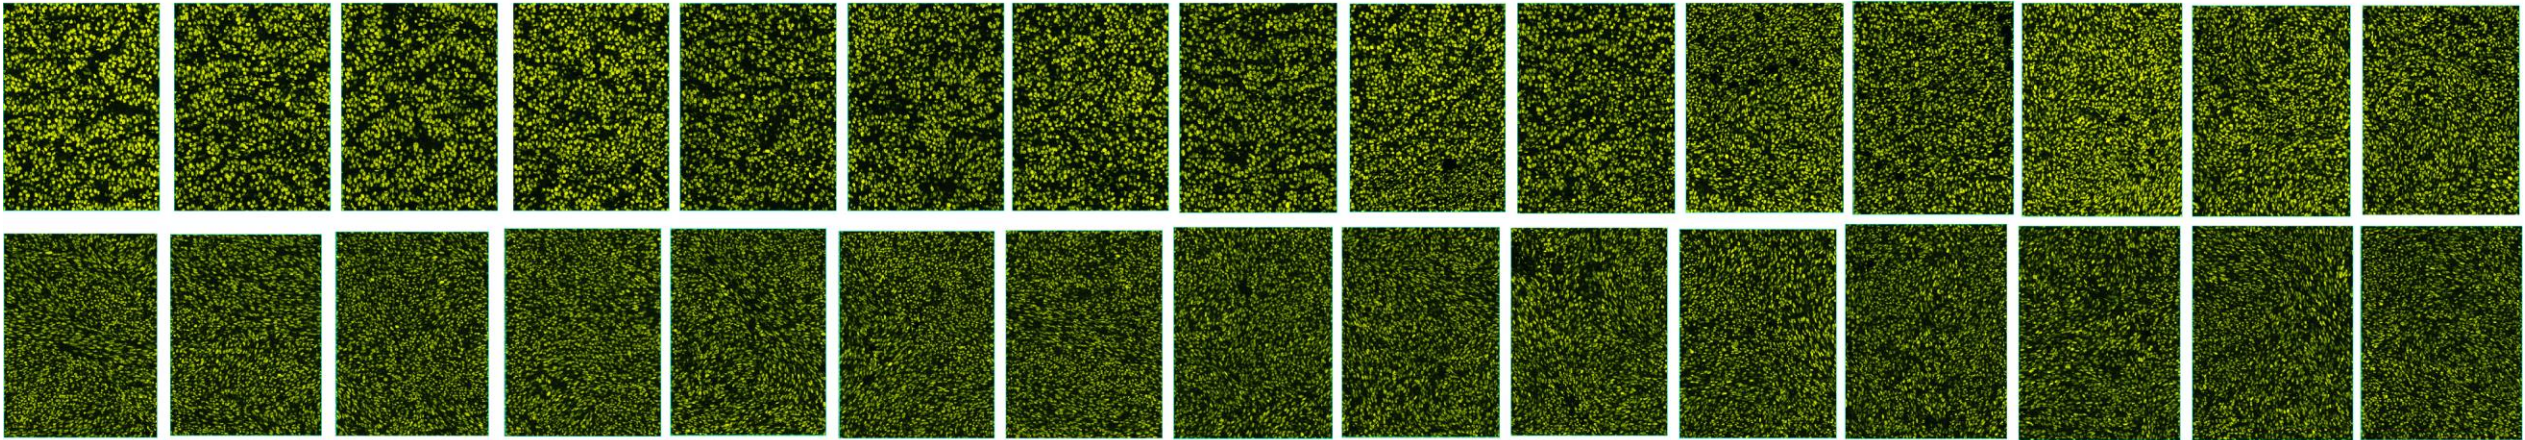

Class 2 Uveal Melanoma

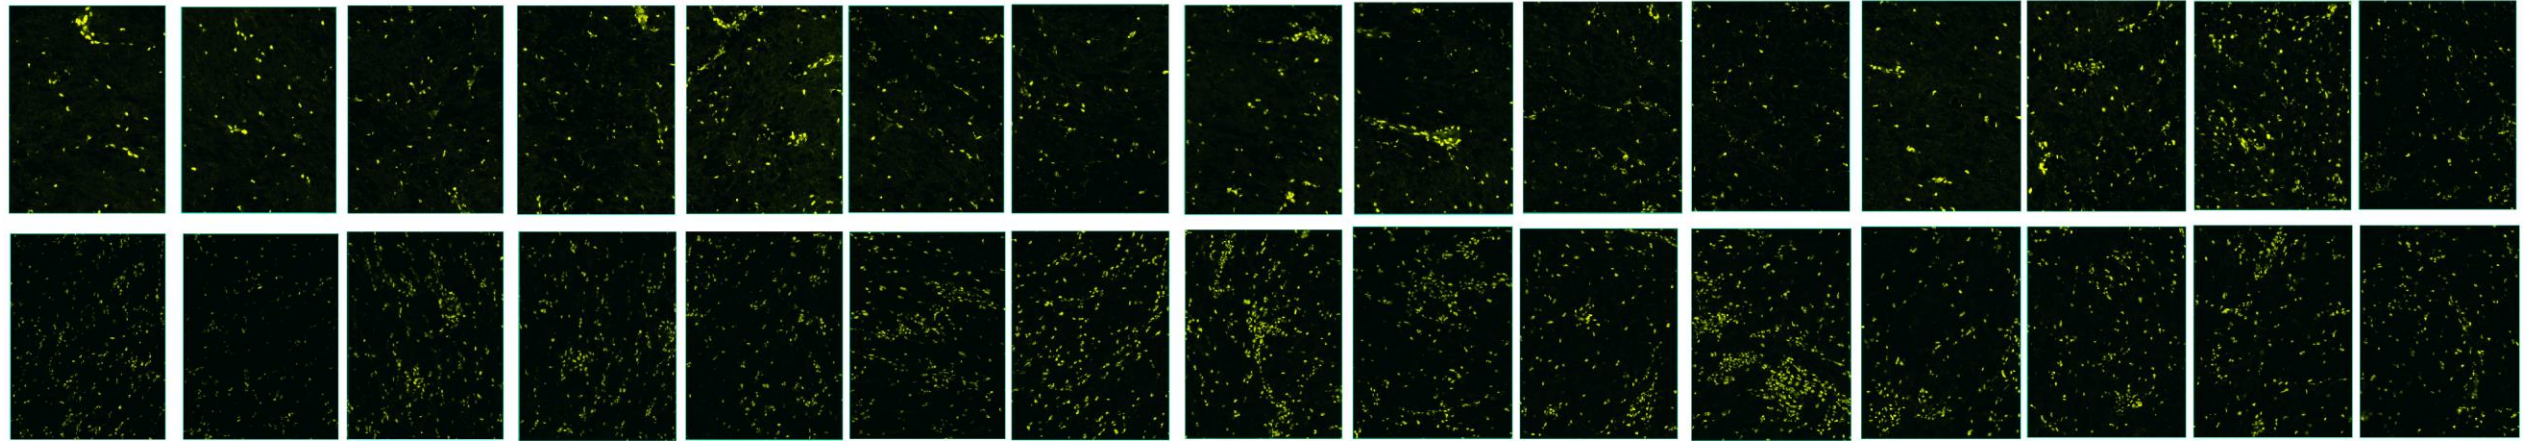

**Figure S5.** Immunohistochemistry for BAP1 from 60 regions from class 1 (UMM65, UMM79) and class 2 (UMM63, UMM69) uveal melanomas.

Class 2 Uveal Melanoma

PROS1: Grey

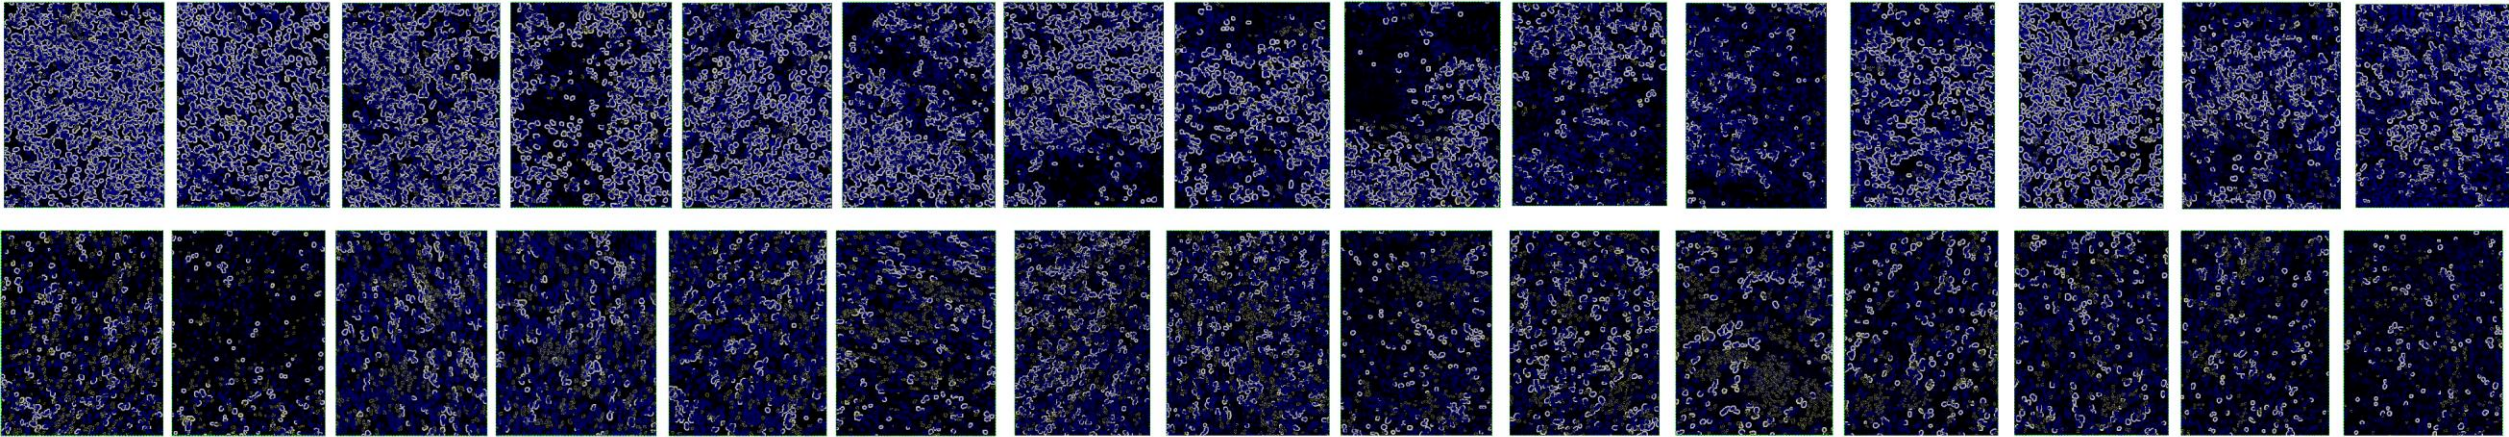

Class 1 Uveal Melanoma

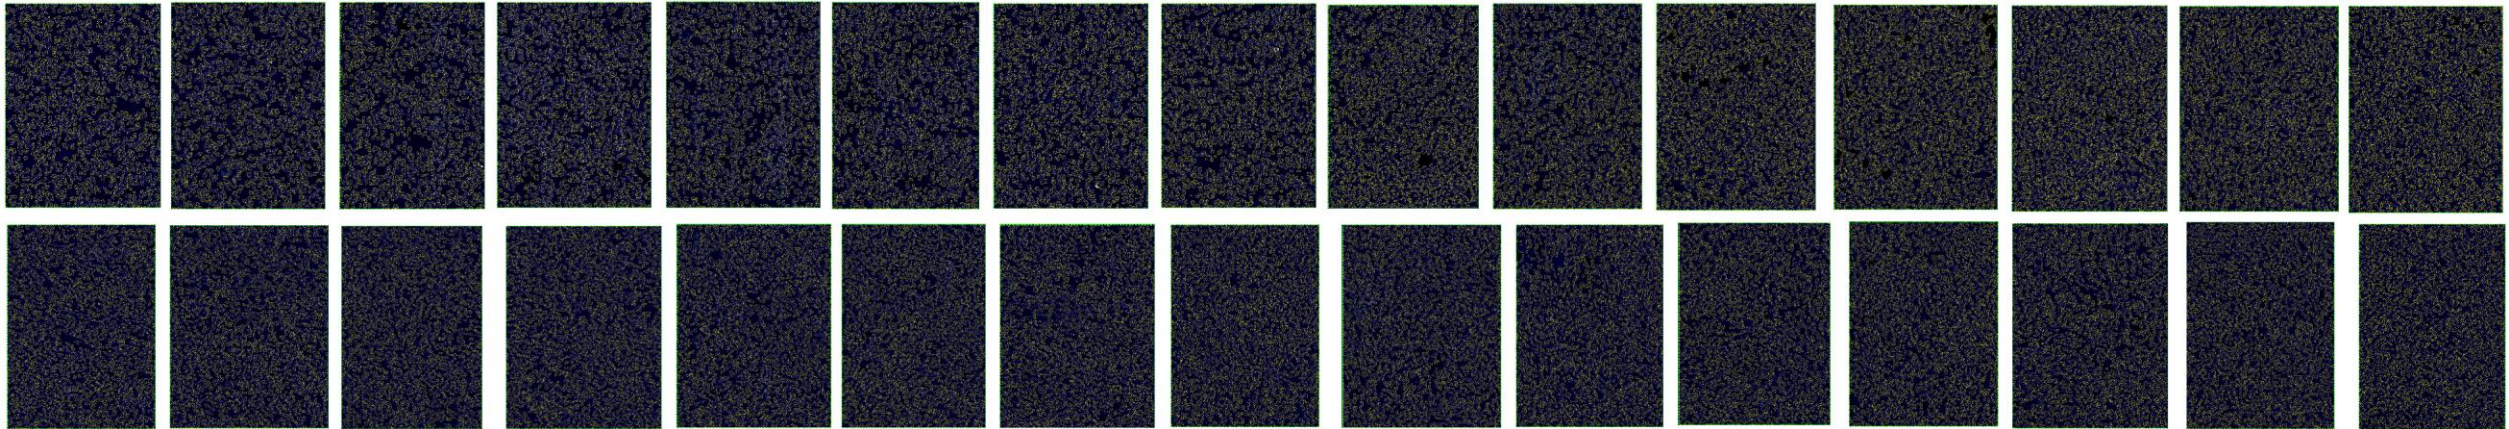

**Figure S6.** Immunohistochemistry for PROS1 from 60 regions from class 1 (UMM65, UMM79) and class 2 (UMM63, UMM69) uveal melanomas.

Class 2 Uveal Melanoma

Phospho-MerTK: Green

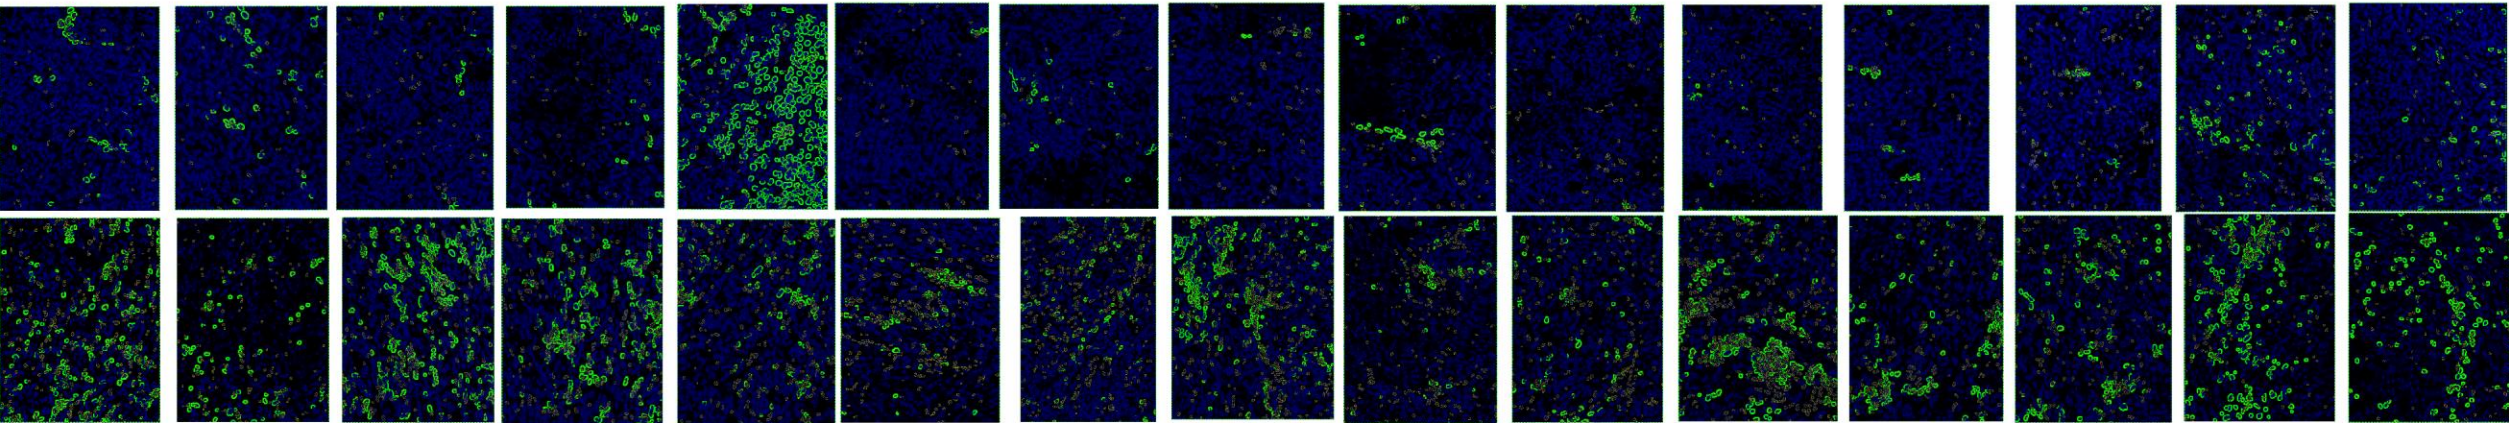

Class 1 Uveal Melanoma

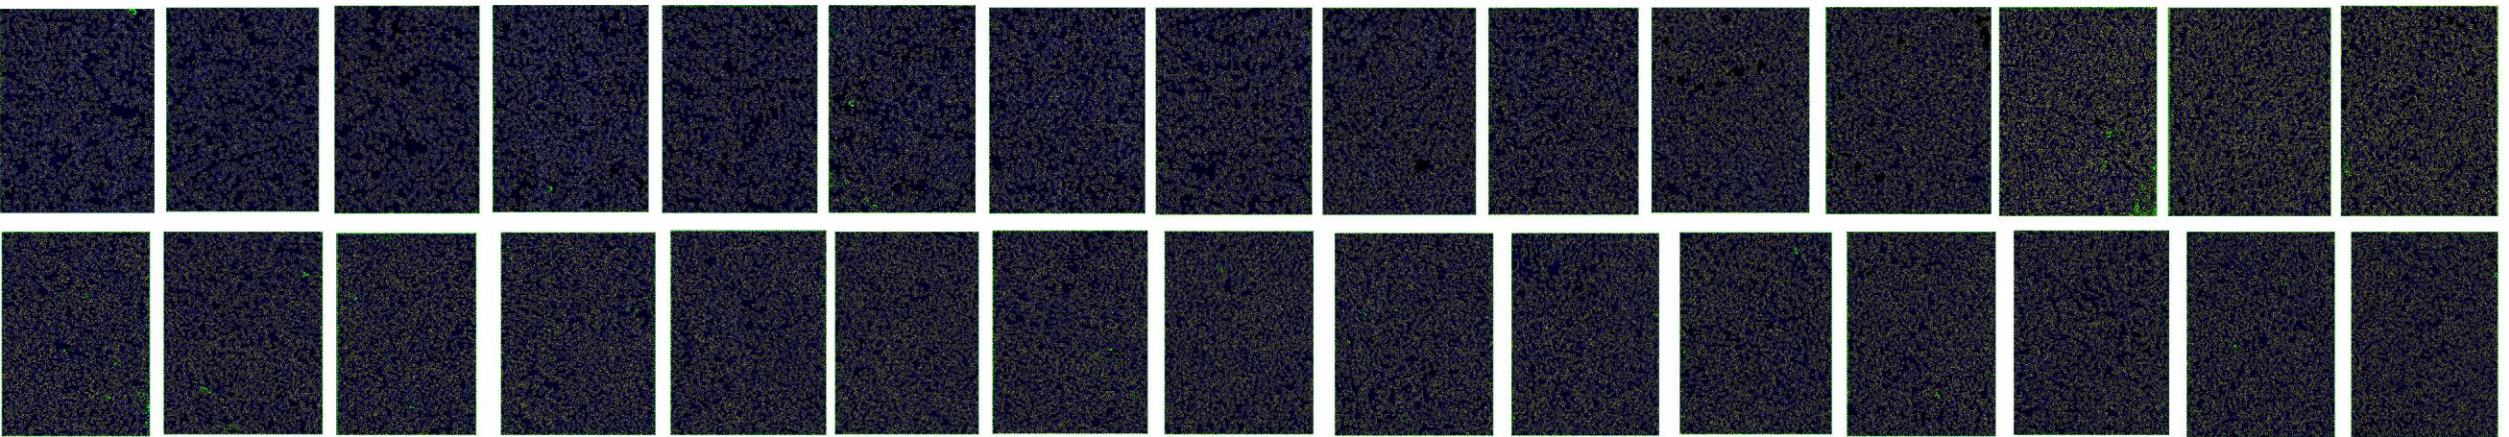

**Figure S7.** Immunohistochemistry for phospho-MERTK regions from class 1 (UMM65, UMM79) and class 2 (UMM63, UMM69) uveal melanomas.

Class 2 Uveal Melanoma

CD163: Red

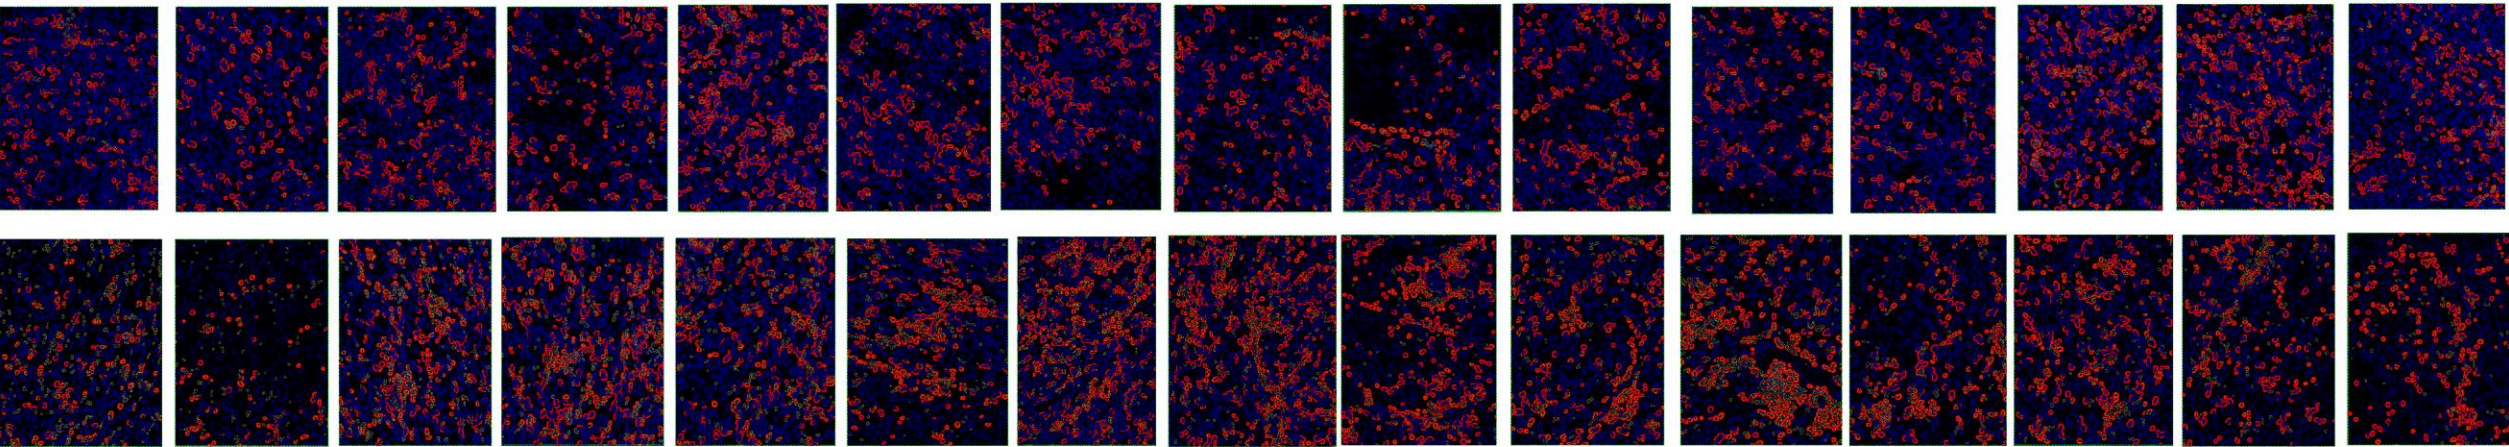

Class 1 Uveal Melanoma

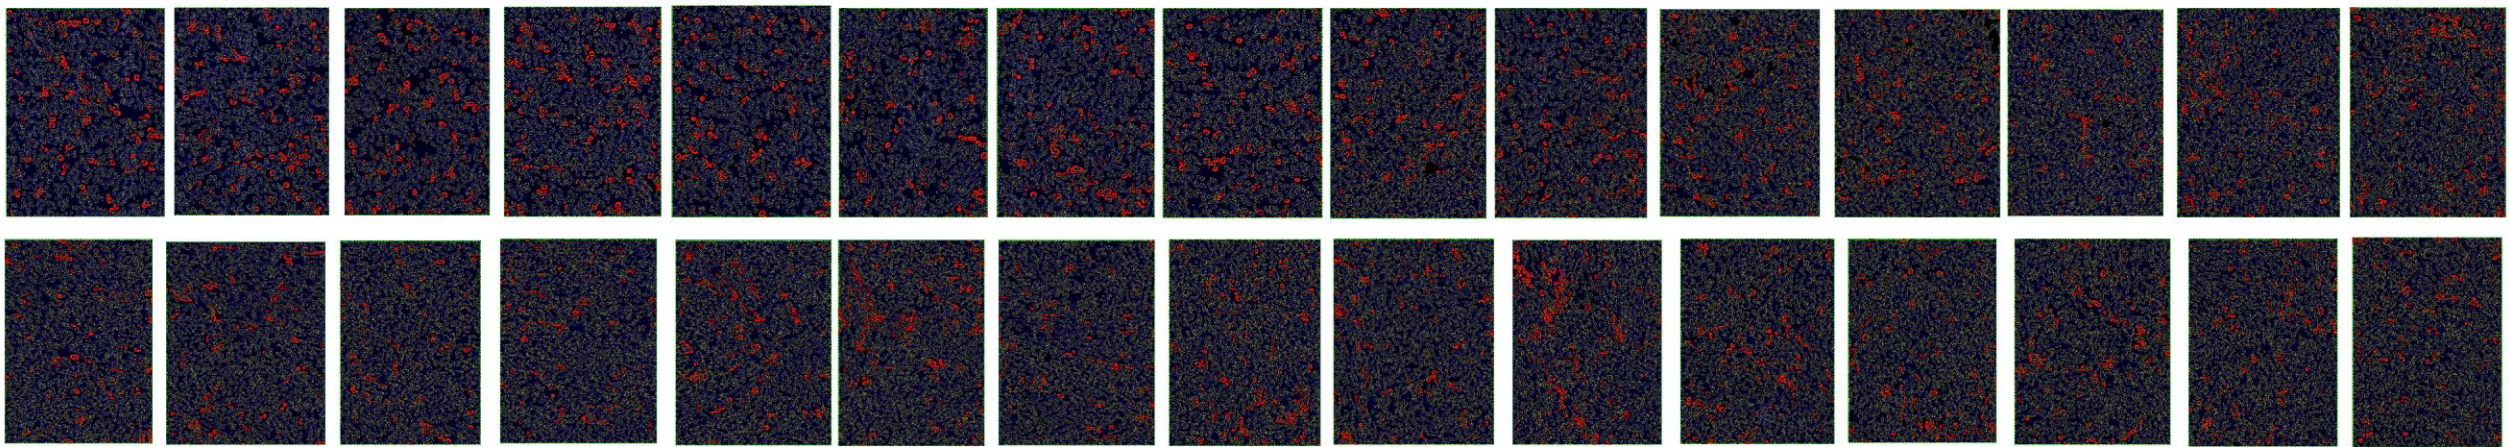

**Figure S8.** Immunohistochemistry for CD163 from 60 regions from class 1 (UMM65, UMM79) and class 2 (UMM63, UMM69) uveal melanomas.
